# Supplementary figures and images for: Clinical, Histopathologic, and Immunohistochemical Features of Patients with IgG/IgA Pemphigus
Source: MDPI journal article supplement (doi:10.3390/biomedicines10051197), 2022-05-22

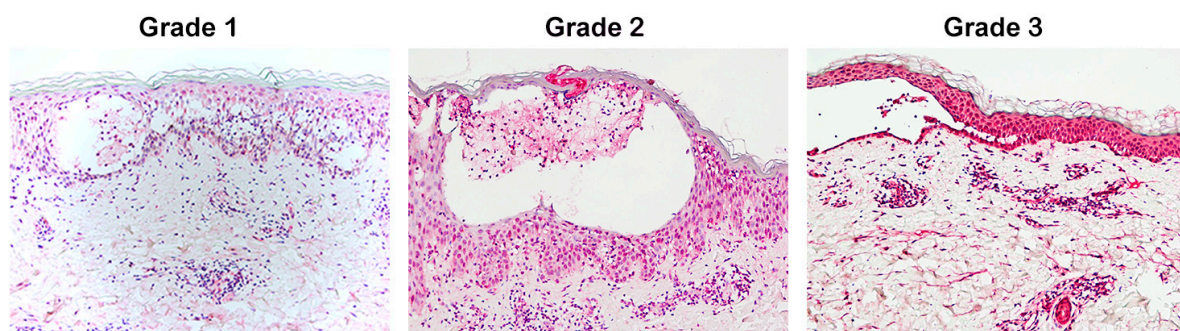

Figure S1: The representative images of IHC grading.

Supplement: s1 [file s1]
